# Supplementary material for: Quantification of crystallinity during indomethacin crystalline transformation from α- to γ-polymorphic forms and of the thermodynamic contribution to dissolution in aqueous buffer and solutions of solubilizer
Source: Royal Society of Chemistry journal article supplement (doi:10.1039/d3ra08481g), 2024-01-01
Supplement: d3ra08481g1.pdf [file d3ra08481g1.pdf]

# Quantification of crystallinity during indomethacin crystalline transformation from $\alpha$ - to $\gamma$ -polymorphic forms and of the thermodynamic contribution to dissolution in aqueous buffer and solutions of solubilizer

Kanji Hasegawa, Satoru Goto\*, Hikaru Kataoka, Hitoshi Chatani, Takatoshi Kinoshita, Hideshi Yokoyama, and Tomohiro Tsuchida

Faculty of Pharmaceutical Sciences, Tokyo University of Science  
2641 Yamazaki, Noda, Chiba, Japan 278-0037

\*Corresponding author: [s.510@rs.tus.ac.jp](mailto:s.510@rs.tus.ac.jp)

## Supporting Information

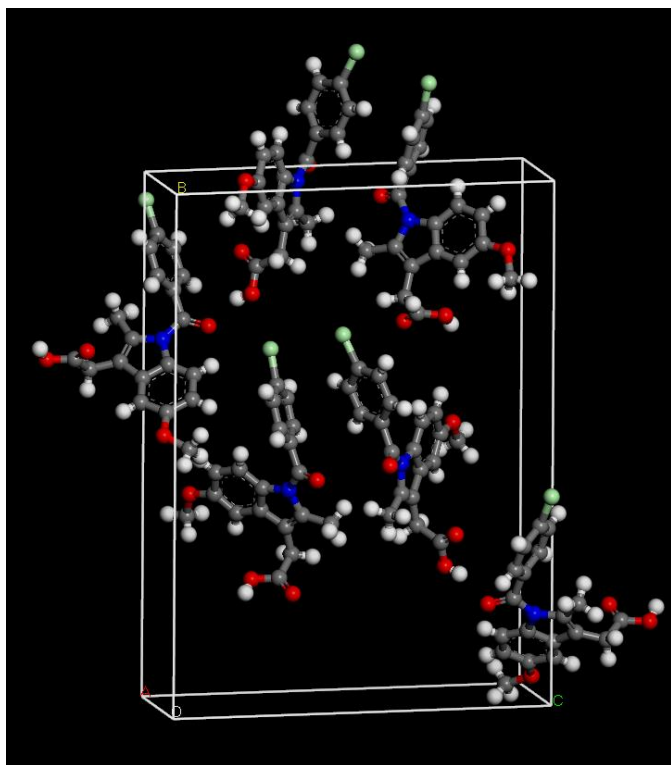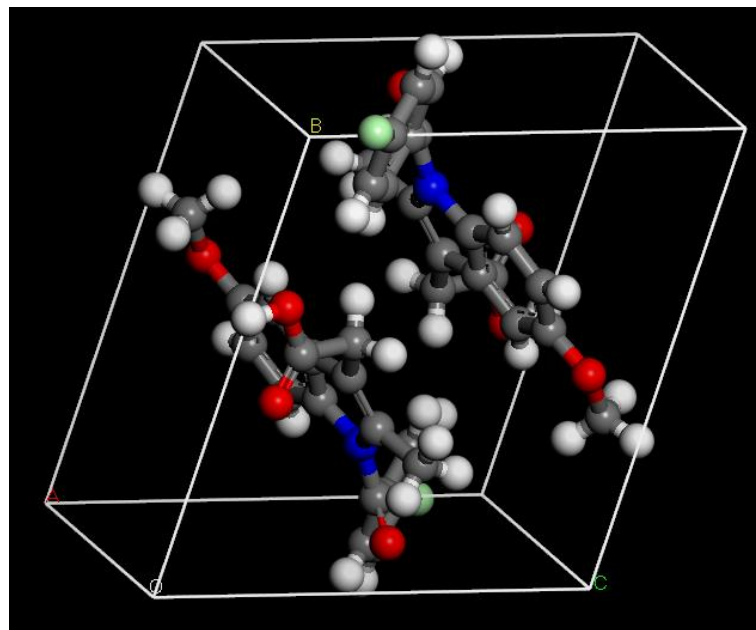

**Scheme S1. The three-dimensional structure of INM;  $\alpha$ -form (left) and  $\gamma$ -form (right).**

**Table S1. Unique XRPD peak positions, C=O stretching modes, and melting point.**

|                                 | <b>XRPD</b>                                                              | <b>ATR-FTIR</b>                                  | <b>DSC</b>                        |
|---------------------------------|--------------------------------------------------------------------------|--------------------------------------------------|-----------------------------------|
| <b>solid-state form</b>         | <b>unique peak position (<math>2\theta</math> / <math>^\circ</math>)</b> | <b>C=O stretch (<math>\text{cm}^{-1}</math>)</b> | <b><math>T_m</math> (K)</b>       |
| <b><math>\alpha</math> form</b> | <b>6.92, 8.46, 14.54</b>                                                 | <b>1734, 1680, 1689, 1649</b>                    | <b><math>425.8 \pm 0.4</math></b> |
| <b><math>\gamma</math> form</b> | <b>11.64, 12.76, 16.74, 21.88</b>                                        | <b>1713, 1690</b>                                | <b><math>433.4 \pm 0.5</math></b> |

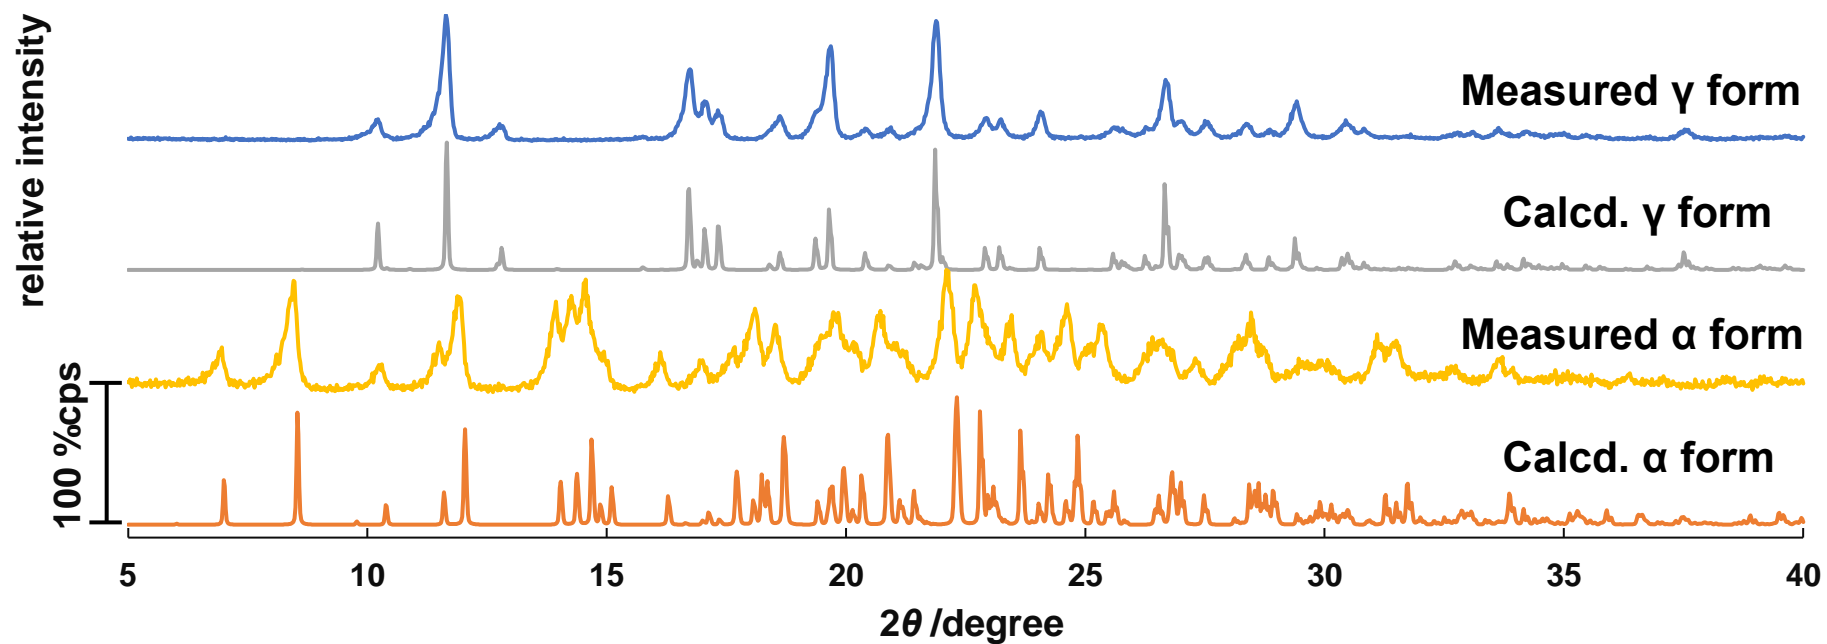

**Figure S1. XRPD diffractograms and diffractograms calculated from the CCDC of  $\alpha$ - and  $\gamma$ -forms.**

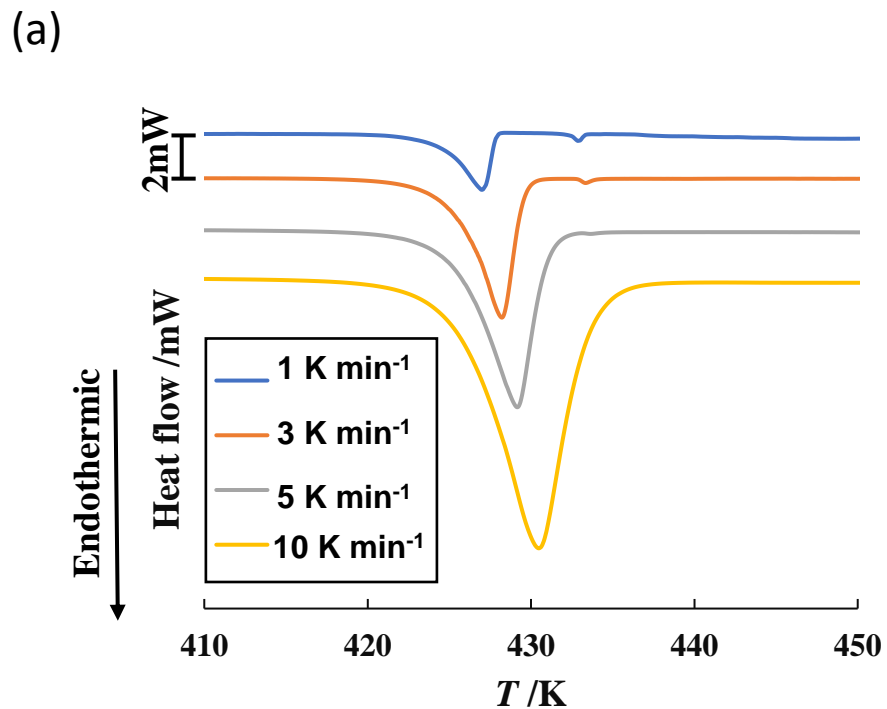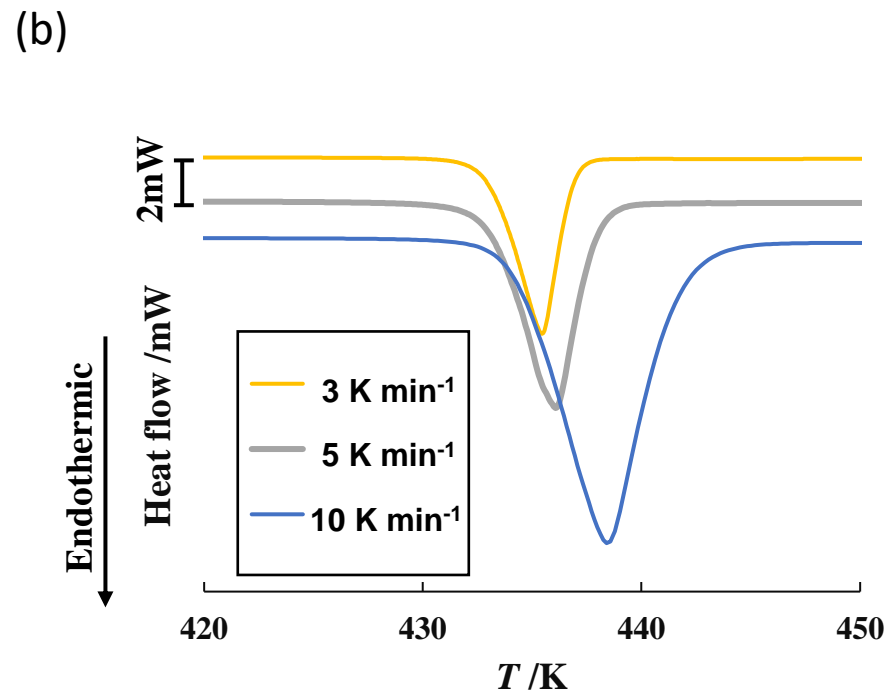

**Figure S2. Differential scanning calorimetry (DSC) of INM crystals at various heating rates;  $\alpha$ -form (a) and  $\gamma$ -form (b).**

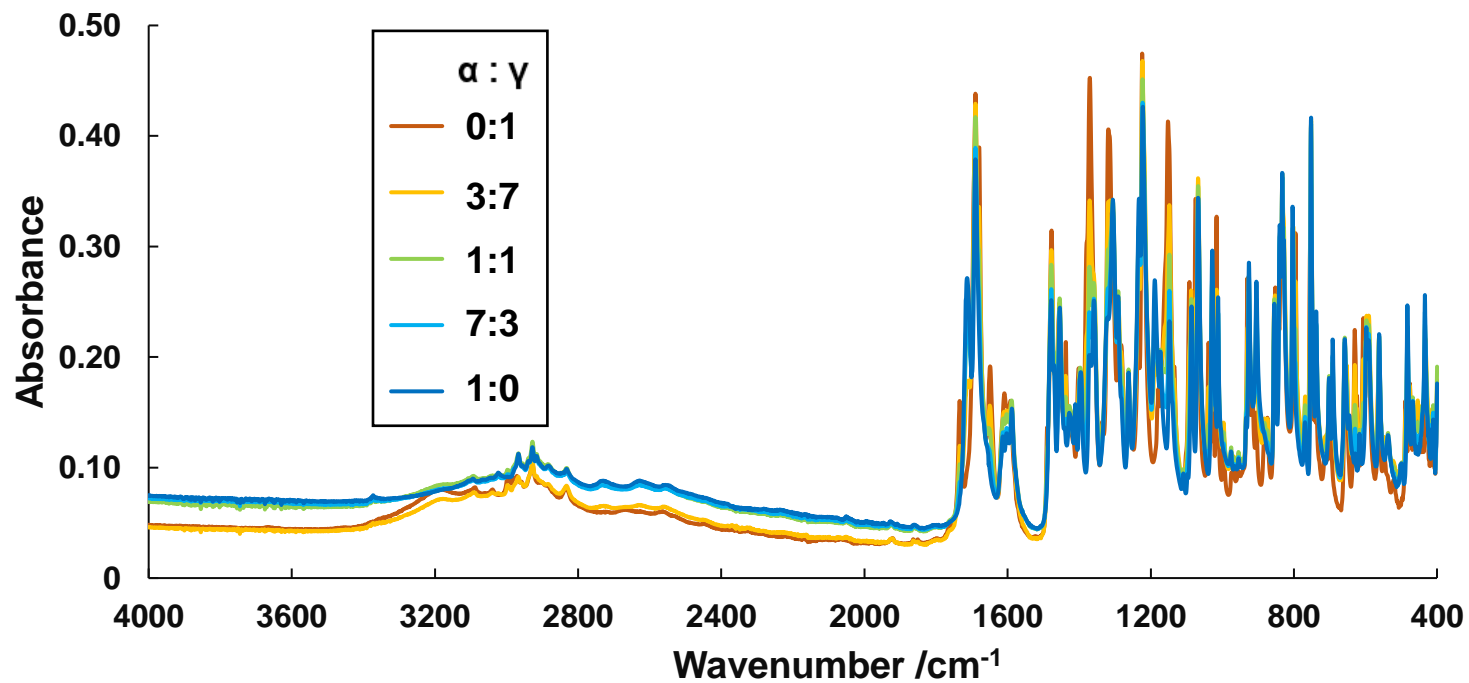

**Figure S3. IR spectra of  $\alpha$ - and  $\gamma$ -forms displayed in full range.**

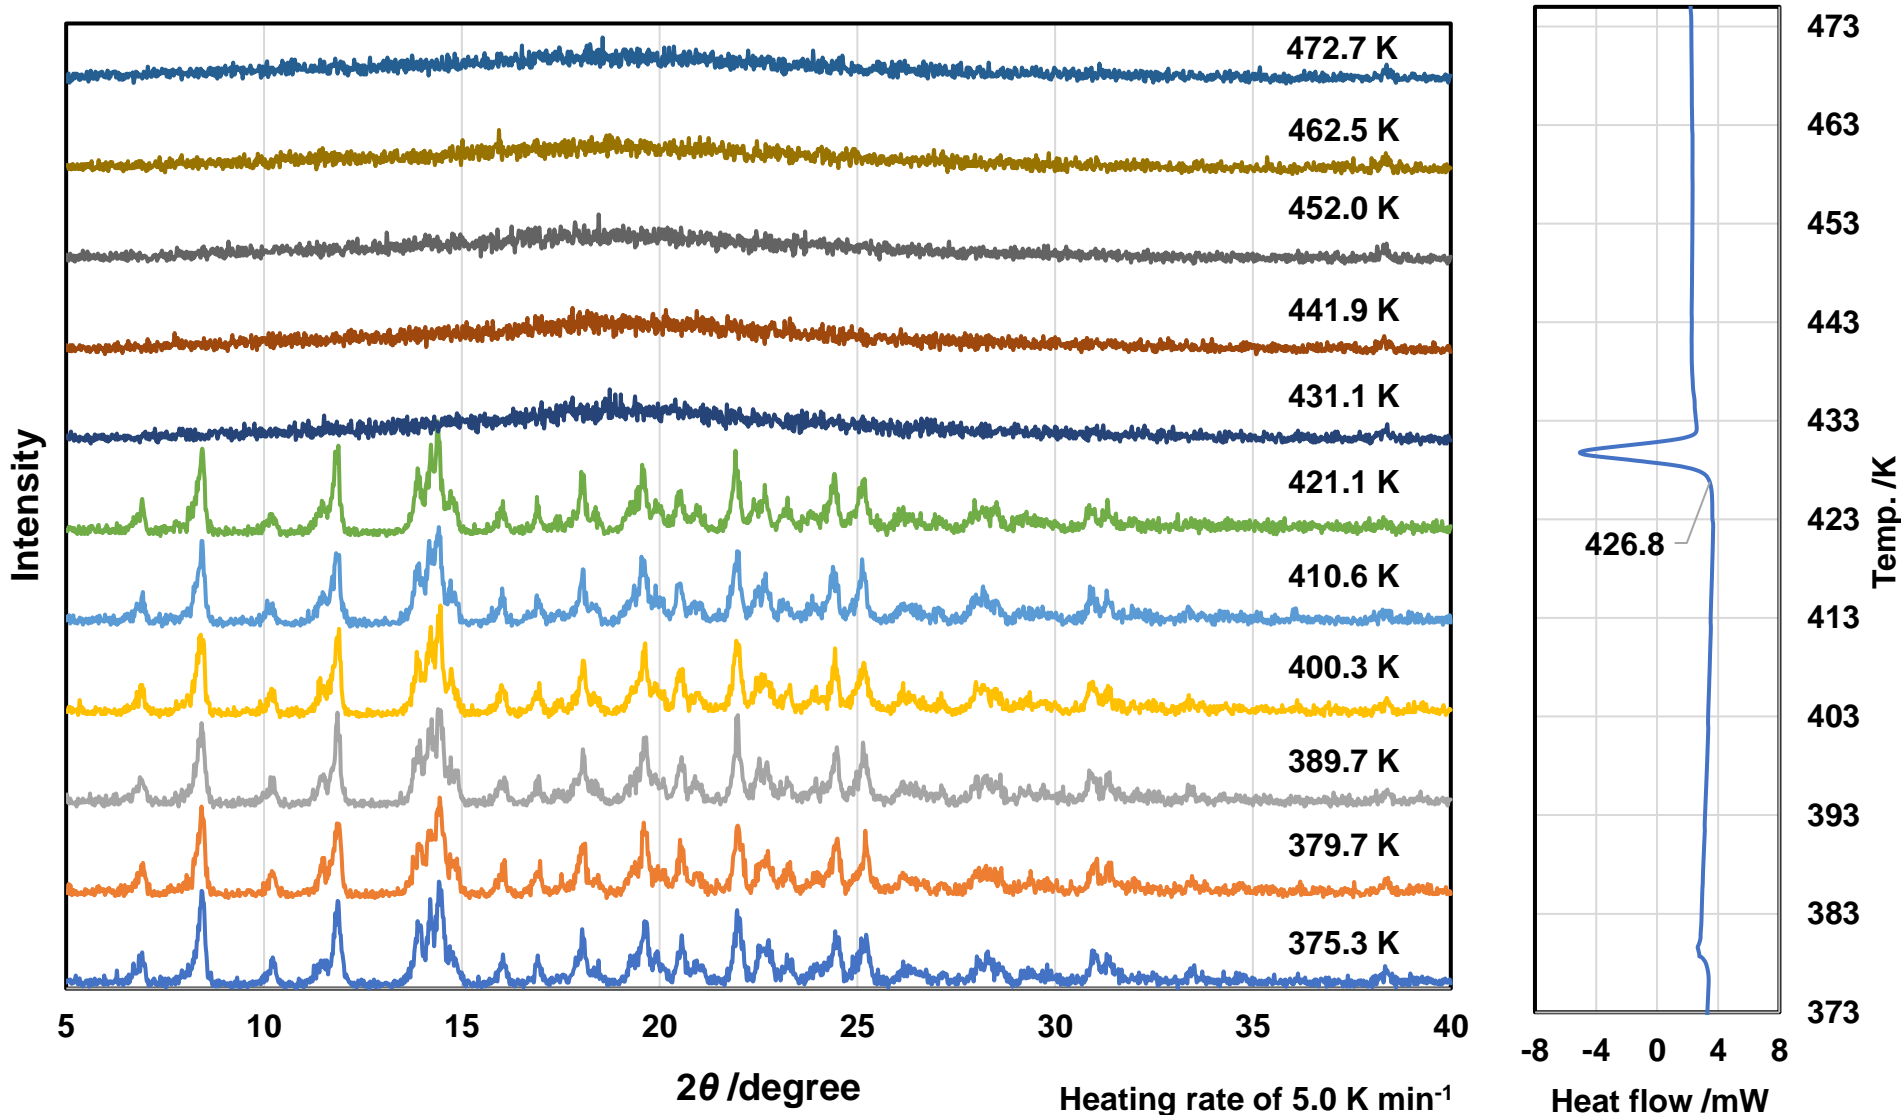

**Figure S4 (a)** The simultaneous DSC-XRD measurement of  $\alpha$ -form of INM at heating rate of 5.0 K min<sup>-1</sup>. XRD legend indicates starting temperature of measurement. An endothermic peak associated with  $\alpha$ -form melting was observed from 426.8 K.

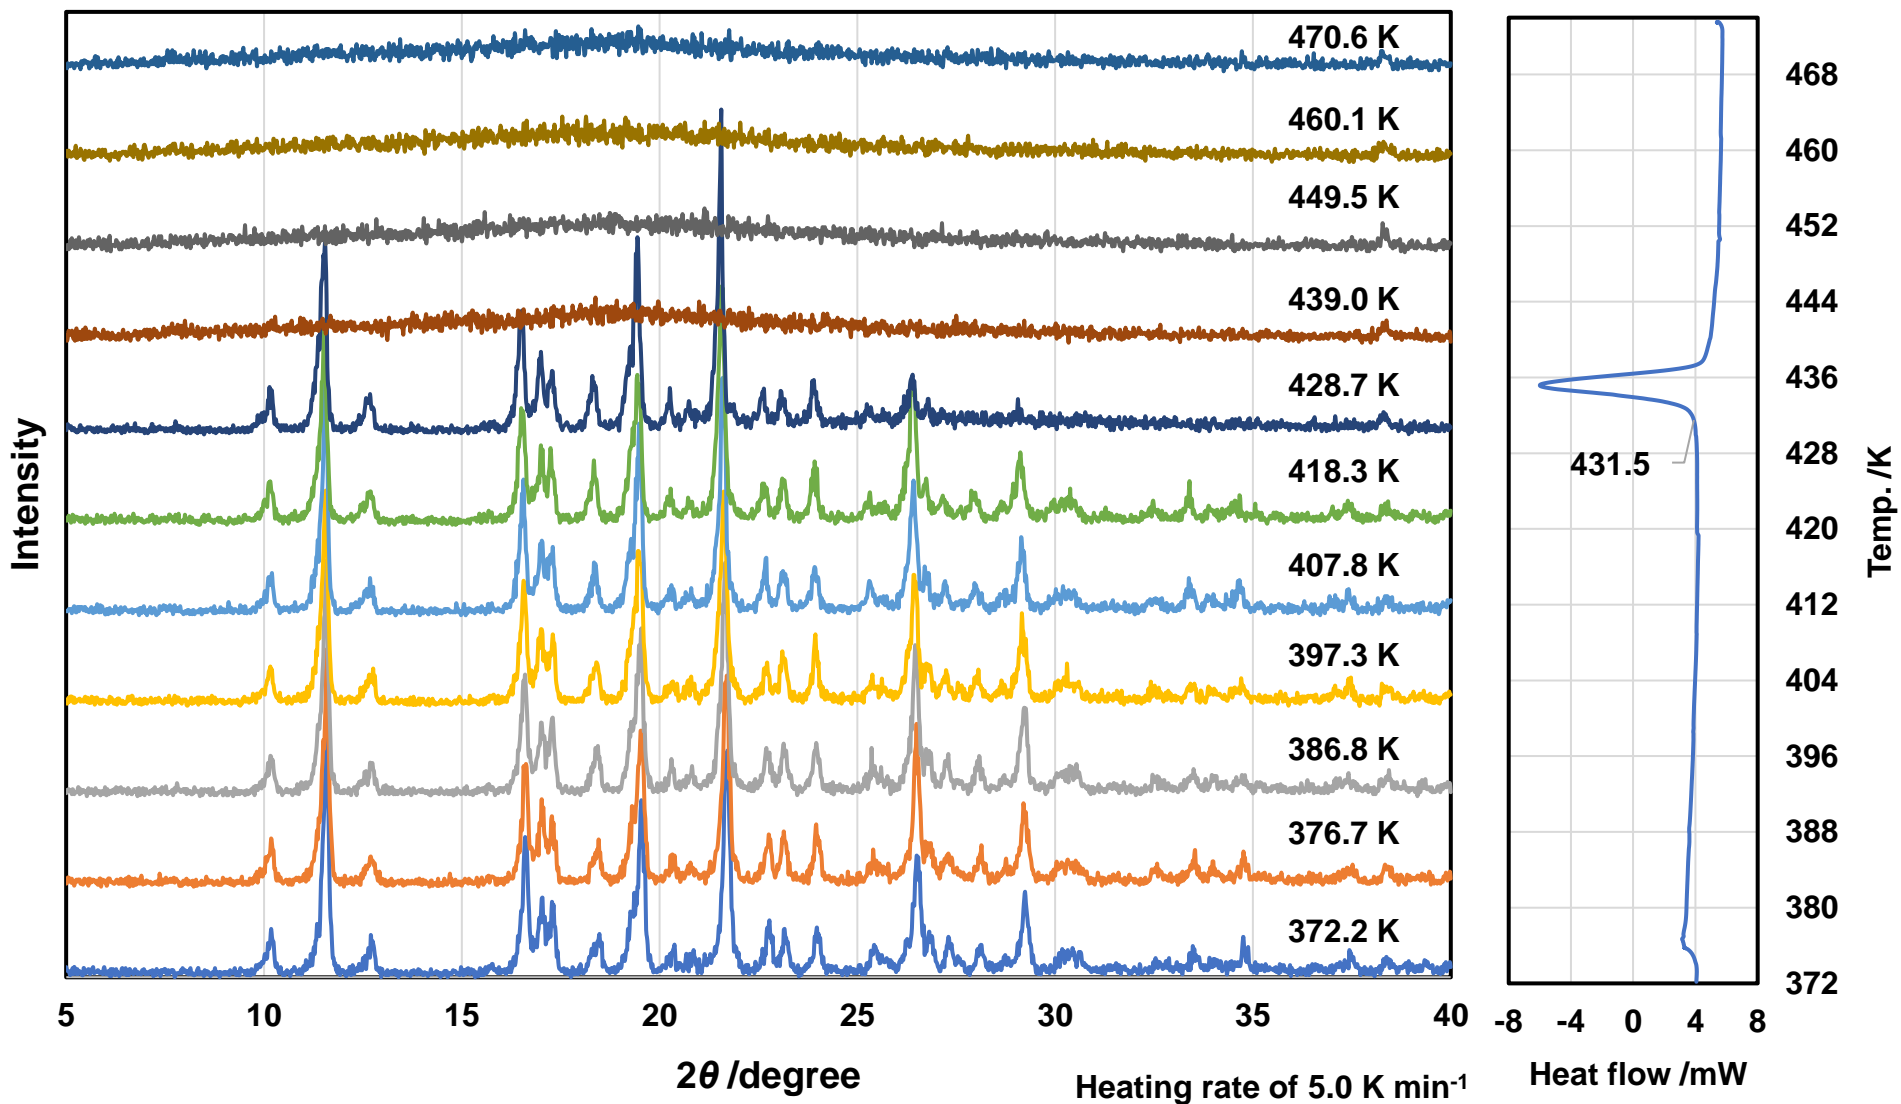

**Figure S4 (b) The simultaneous DSC-XRD measurement of  $\gamma$ -form of INM at heating rate of 5.0 K min<sup>-1</sup>. An endothermic peak associated with  $\alpha$ -form melting was observed from 431.5 K.**



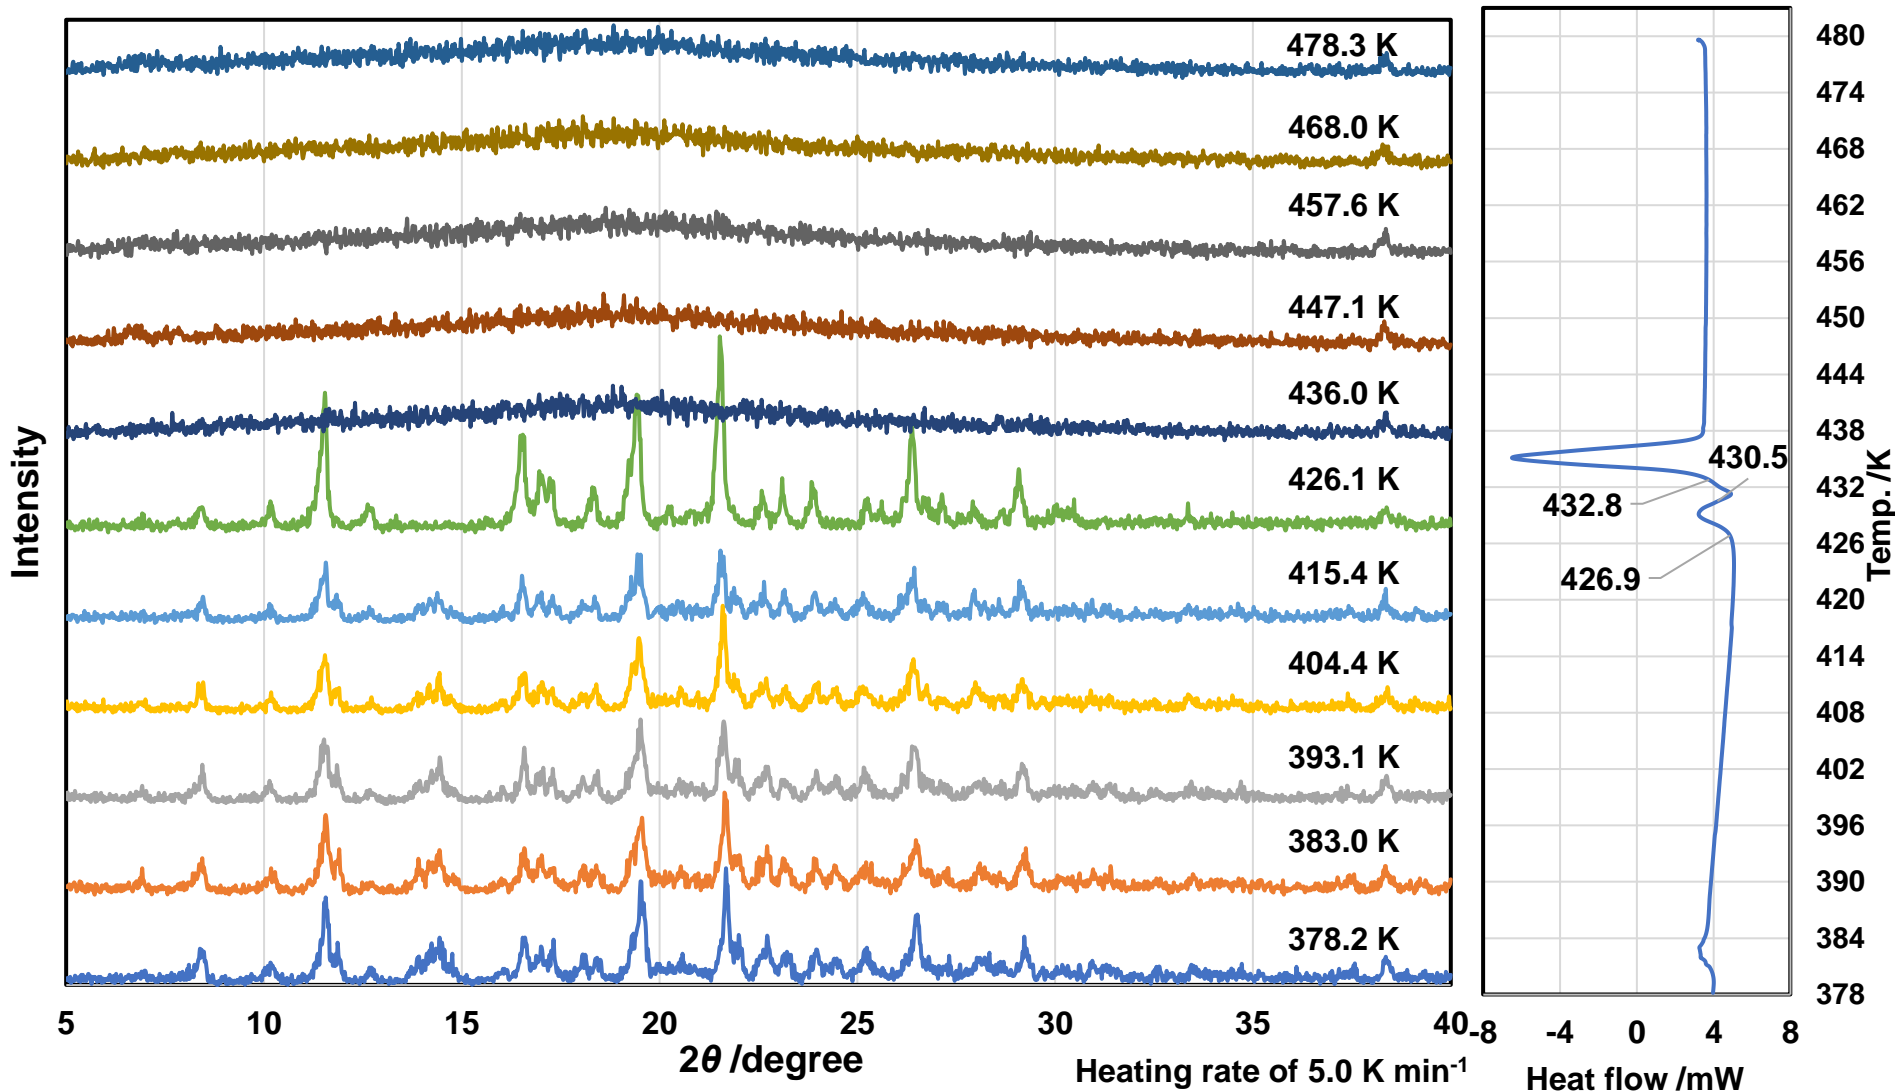

**Figure S4 (c)** The simultaneous DSC-XRD measurement of mixture of  $\alpha$ -INM :  $\gamma$ -INM=1:1 at heating rate of 5.0 K min<sup>-1</sup>. The fusion of the  $\alpha$ -form is shown at 426.9 K. An exothermic peak was observed at 430.5 K. The fusion of the  $\gamma$ -form is shown at 432.8 K.

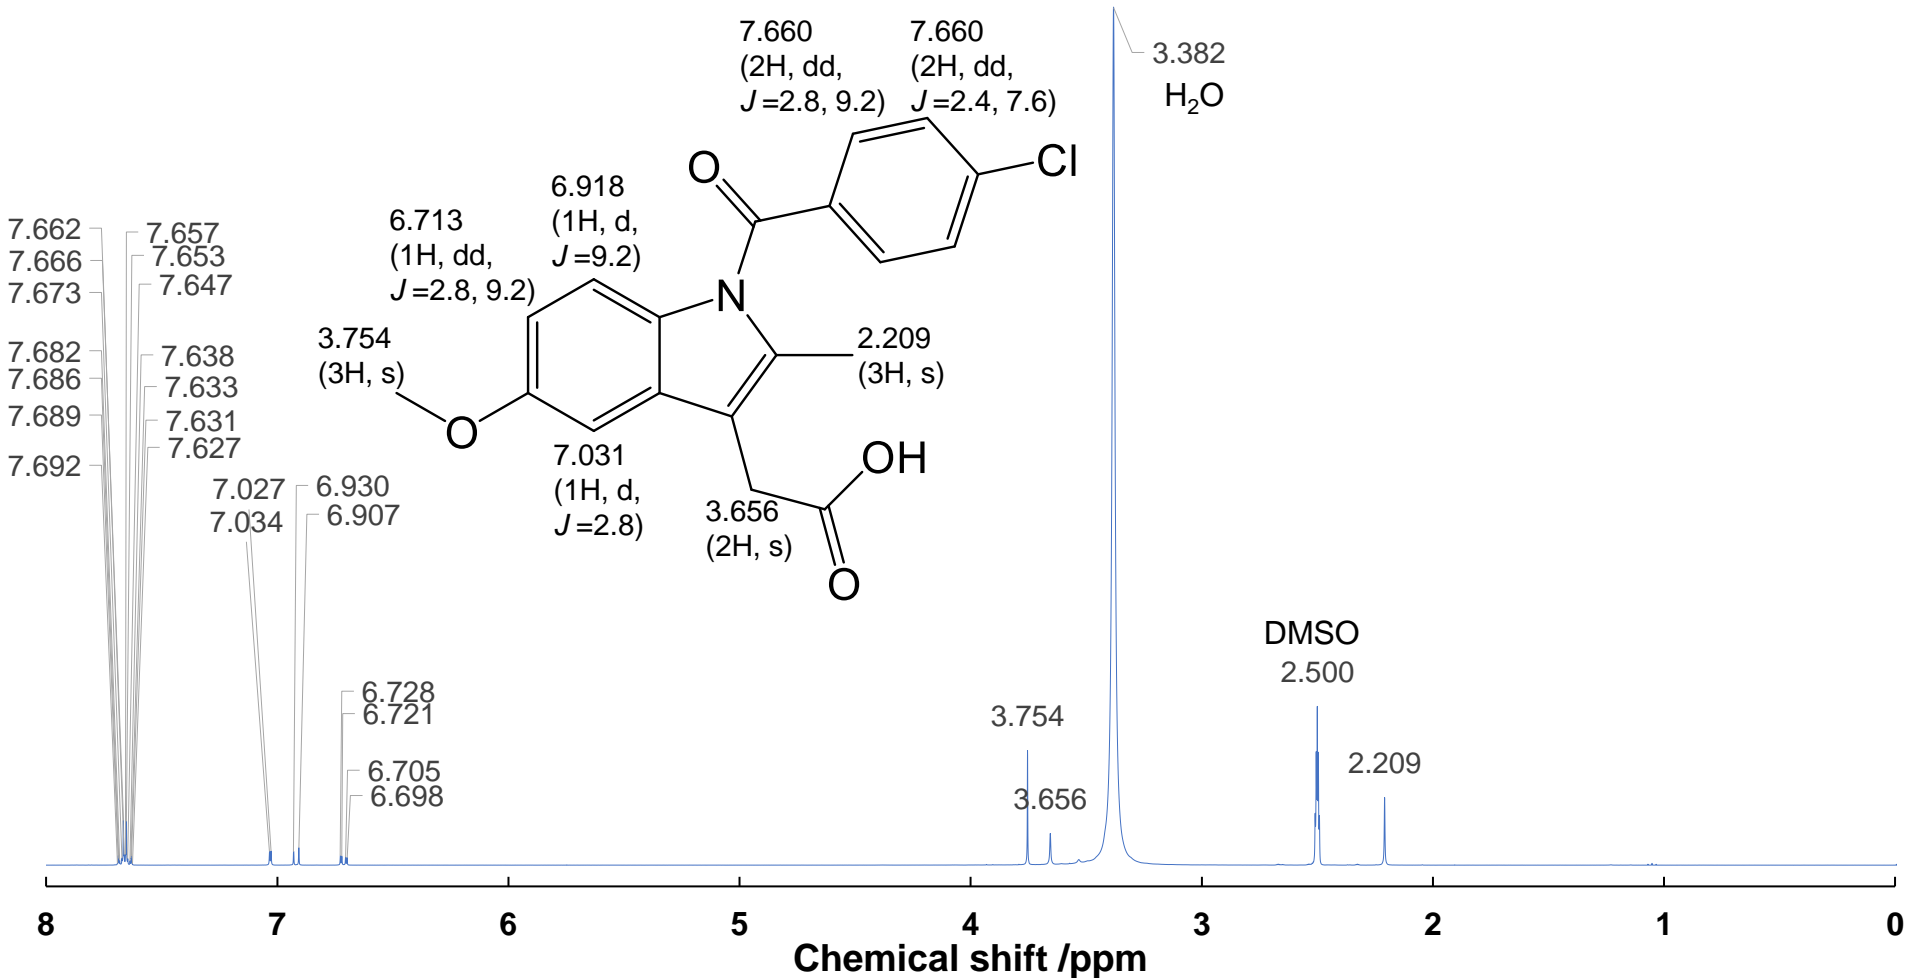

**Figure S5(A)** The  $^1\text{H-NMR}$  (400 MHz,  $\text{DMSO-d}_6$  at 2.500 ppm) spectrum of the precipitate after shaking  $\alpha$ -form of INM in 25 mM  $\text{KH}_2\text{PO}_4/\text{Na}_2\text{HPO}_4$  buffer (pH 6.8). Chemical shifts are listed at the assigned positions in the chemical structural formulas. The number of protons, coupling, and spin-spin coupling constants are shown in parentheses.

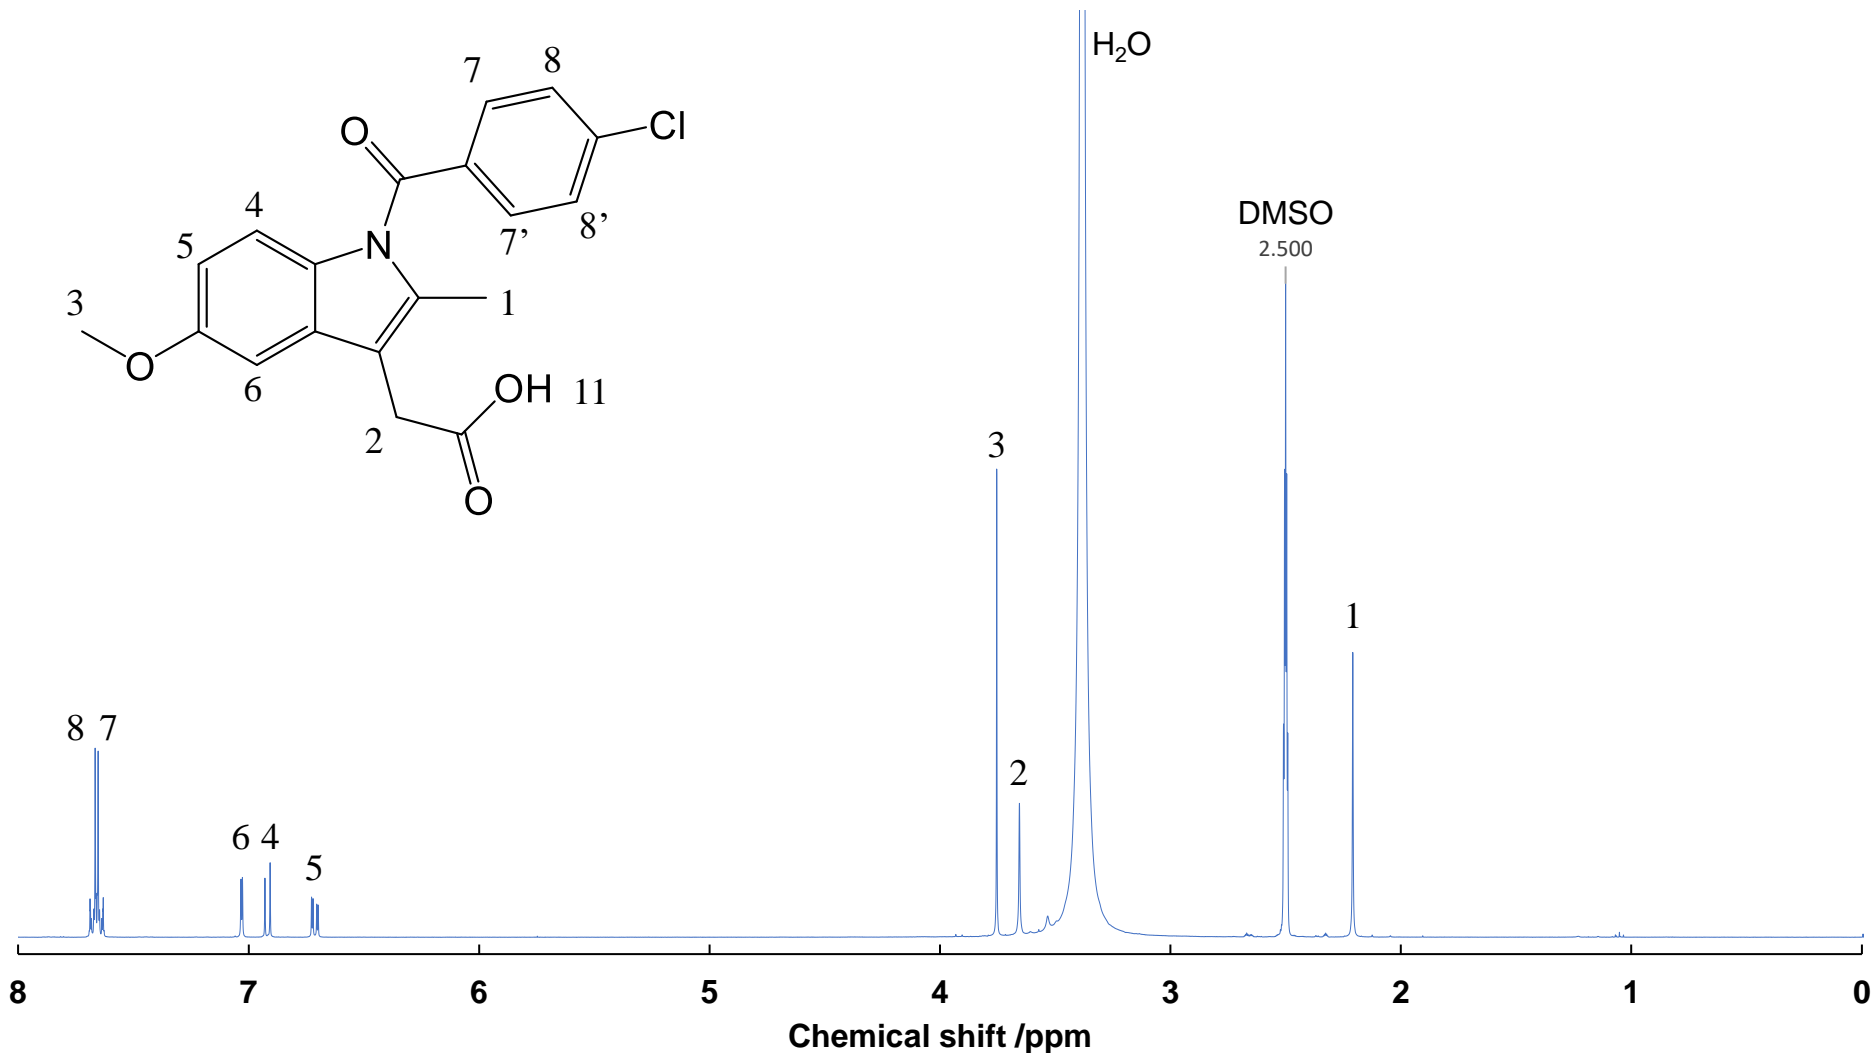

**Figure S5(B)** The 400 MHz <sup>1</sup>H-NMR spectrum of the precipitate after shaking α-form of INM in 25 mM KH<sub>2</sub>PO<sub>4</sub>/Na<sub>2</sub>HPO<sub>4</sub> buffer (pH 6.8) in the presence of 10 mM LDC for 120 min. Only the indomethacin signal was observed and no LDC signal was assigned.

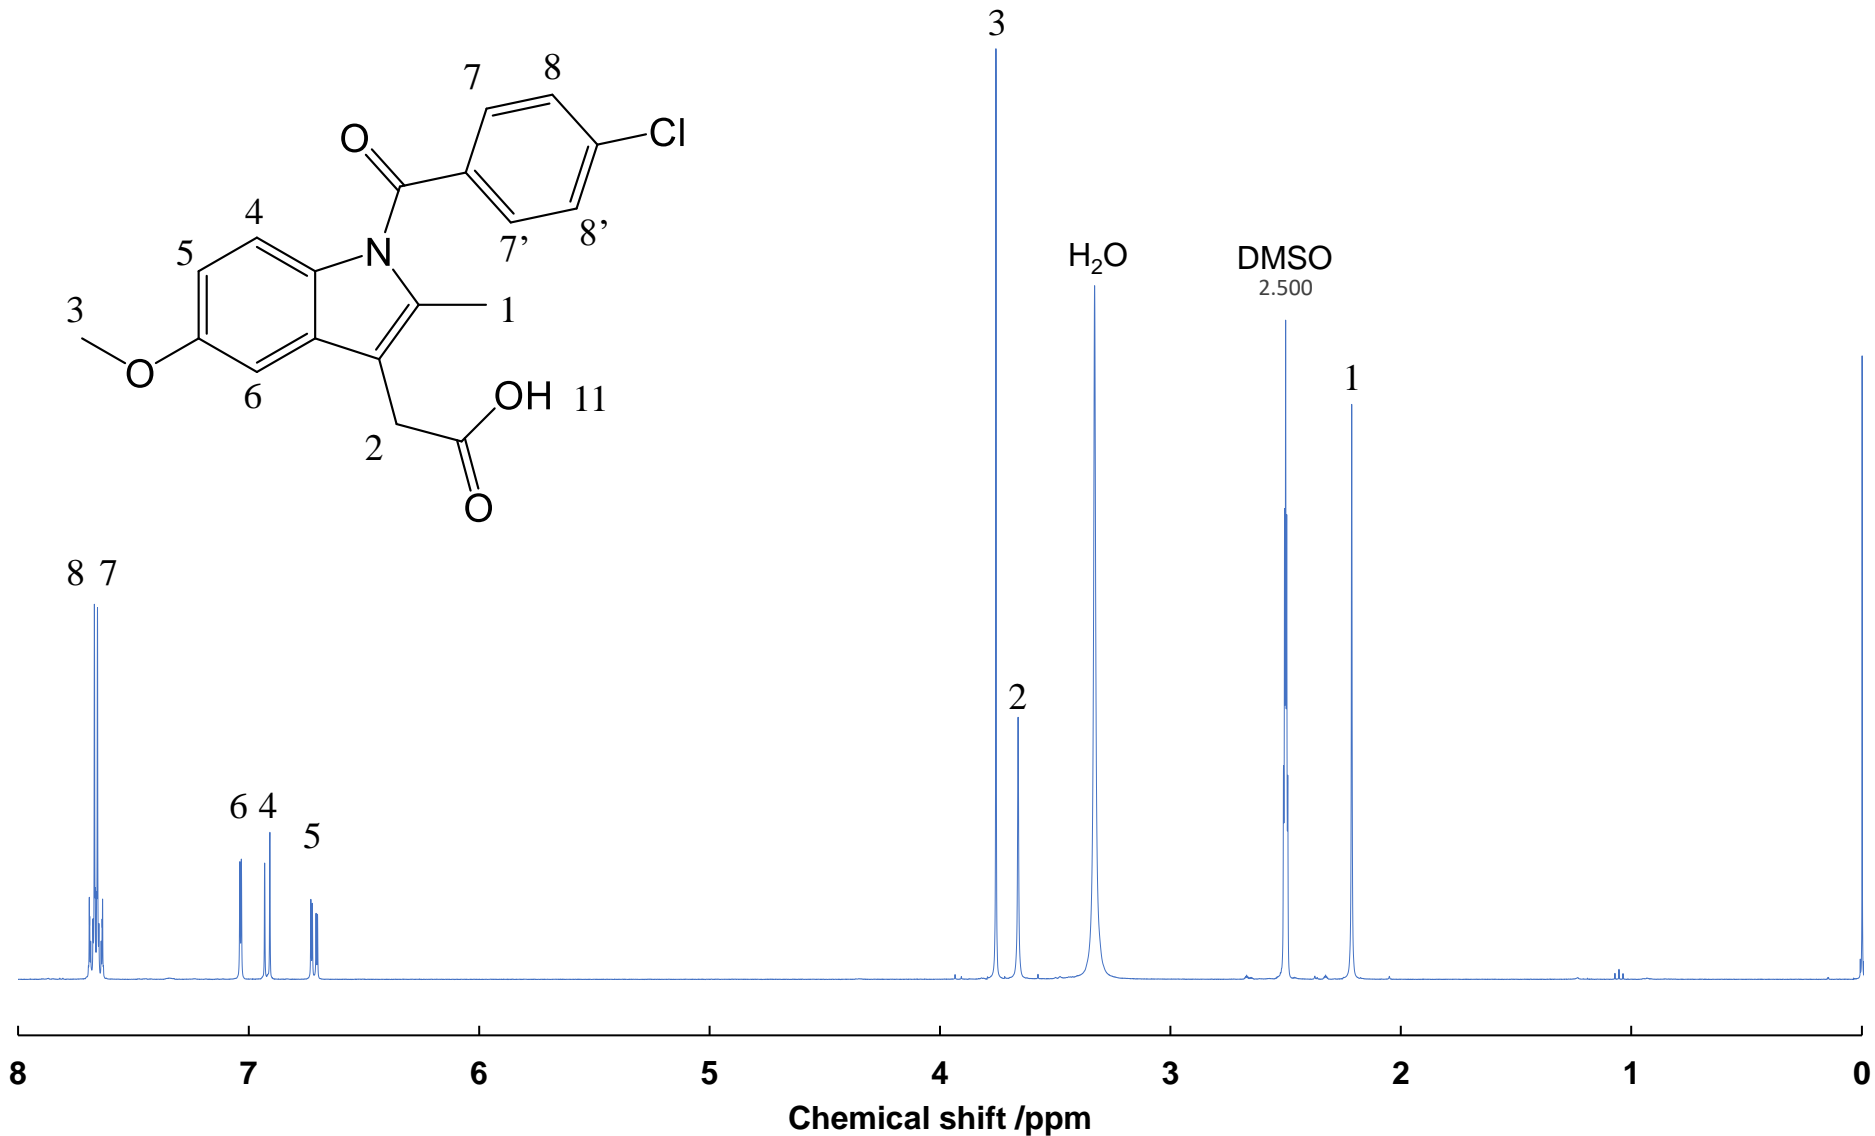

**Figure S5(C)** The 400 MHz <sup>1</sup>H-NMR spectrum of the precipitate after shaking α-form of INM in 25 mM KH<sub>2</sub>PO<sub>4</sub>/Na<sub>2</sub>HPO<sub>4</sub> buffer (pH 6.8) in the presence of 10 mM CNS for 120 min. Only the indomethacin signal was observed and no CNS signal was assigned.

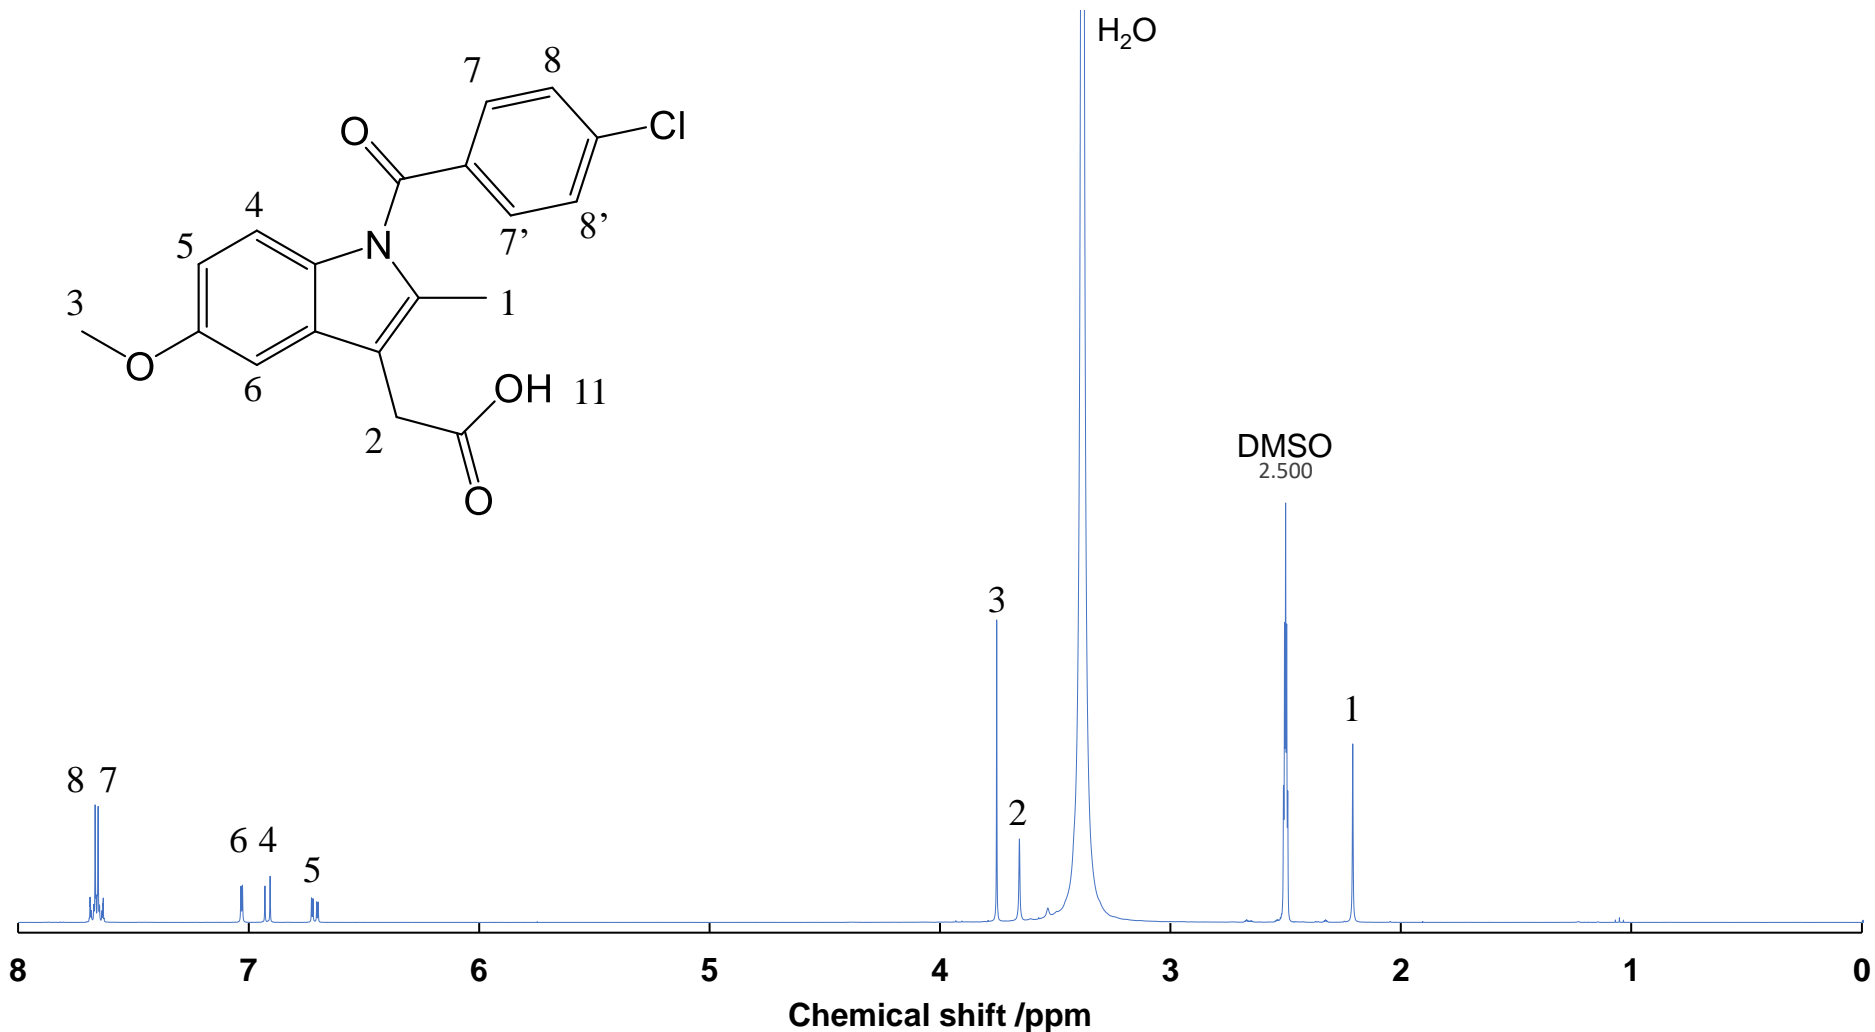

**Figure S5(D) The 400 MHz <sup>1</sup>H-NMR spectrum of the precipitate after shaking  $\alpha$ -form of INM in 25 mM  $\text{KH}_2\text{PO}_4/\text{Na}_2\text{HPO}_4$  buffer (pH 6.8) in the presence of 10 mM APM for 120 min. Only the indomethacin signal was observed and no APM signal was assigned.**

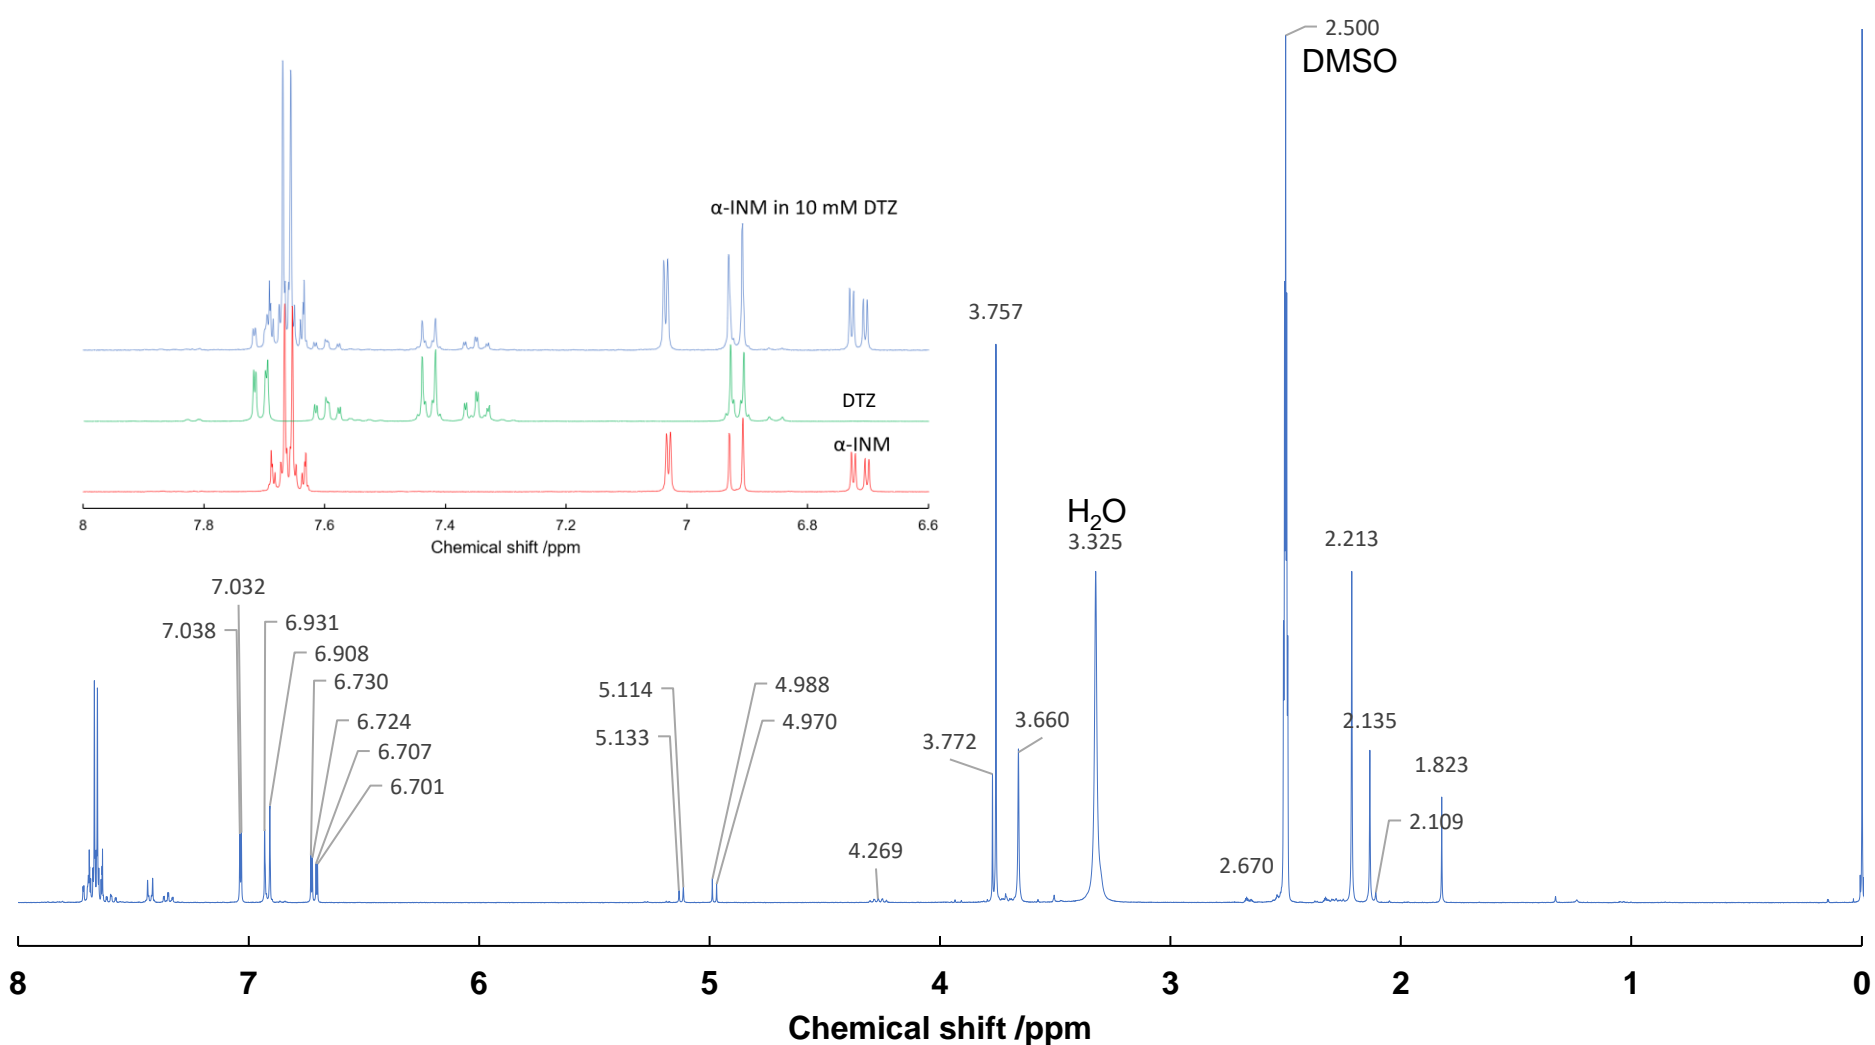

**Figure S5(E) The 400 MHz <sup>1</sup>H-NMR spectrum of the precipitate after shaking α-form of INM in 25 mM KH<sub>2</sub>PO<sub>4</sub>/Na<sub>2</sub>HPO<sub>4</sub> buffer (pH 6.8) in the presence of 10 mM DTZ for 120 min. Judging from the integral value of protons, it was confirmed that DTZ : INM was present in the precipitate at a ratio of 1:7.5, but no change in signal was observed. These findings suggest that the possibility of salt formation or co-crystallization between indomethacin and the solubilizers is low, indicating that indomethacin remains unaffected.**

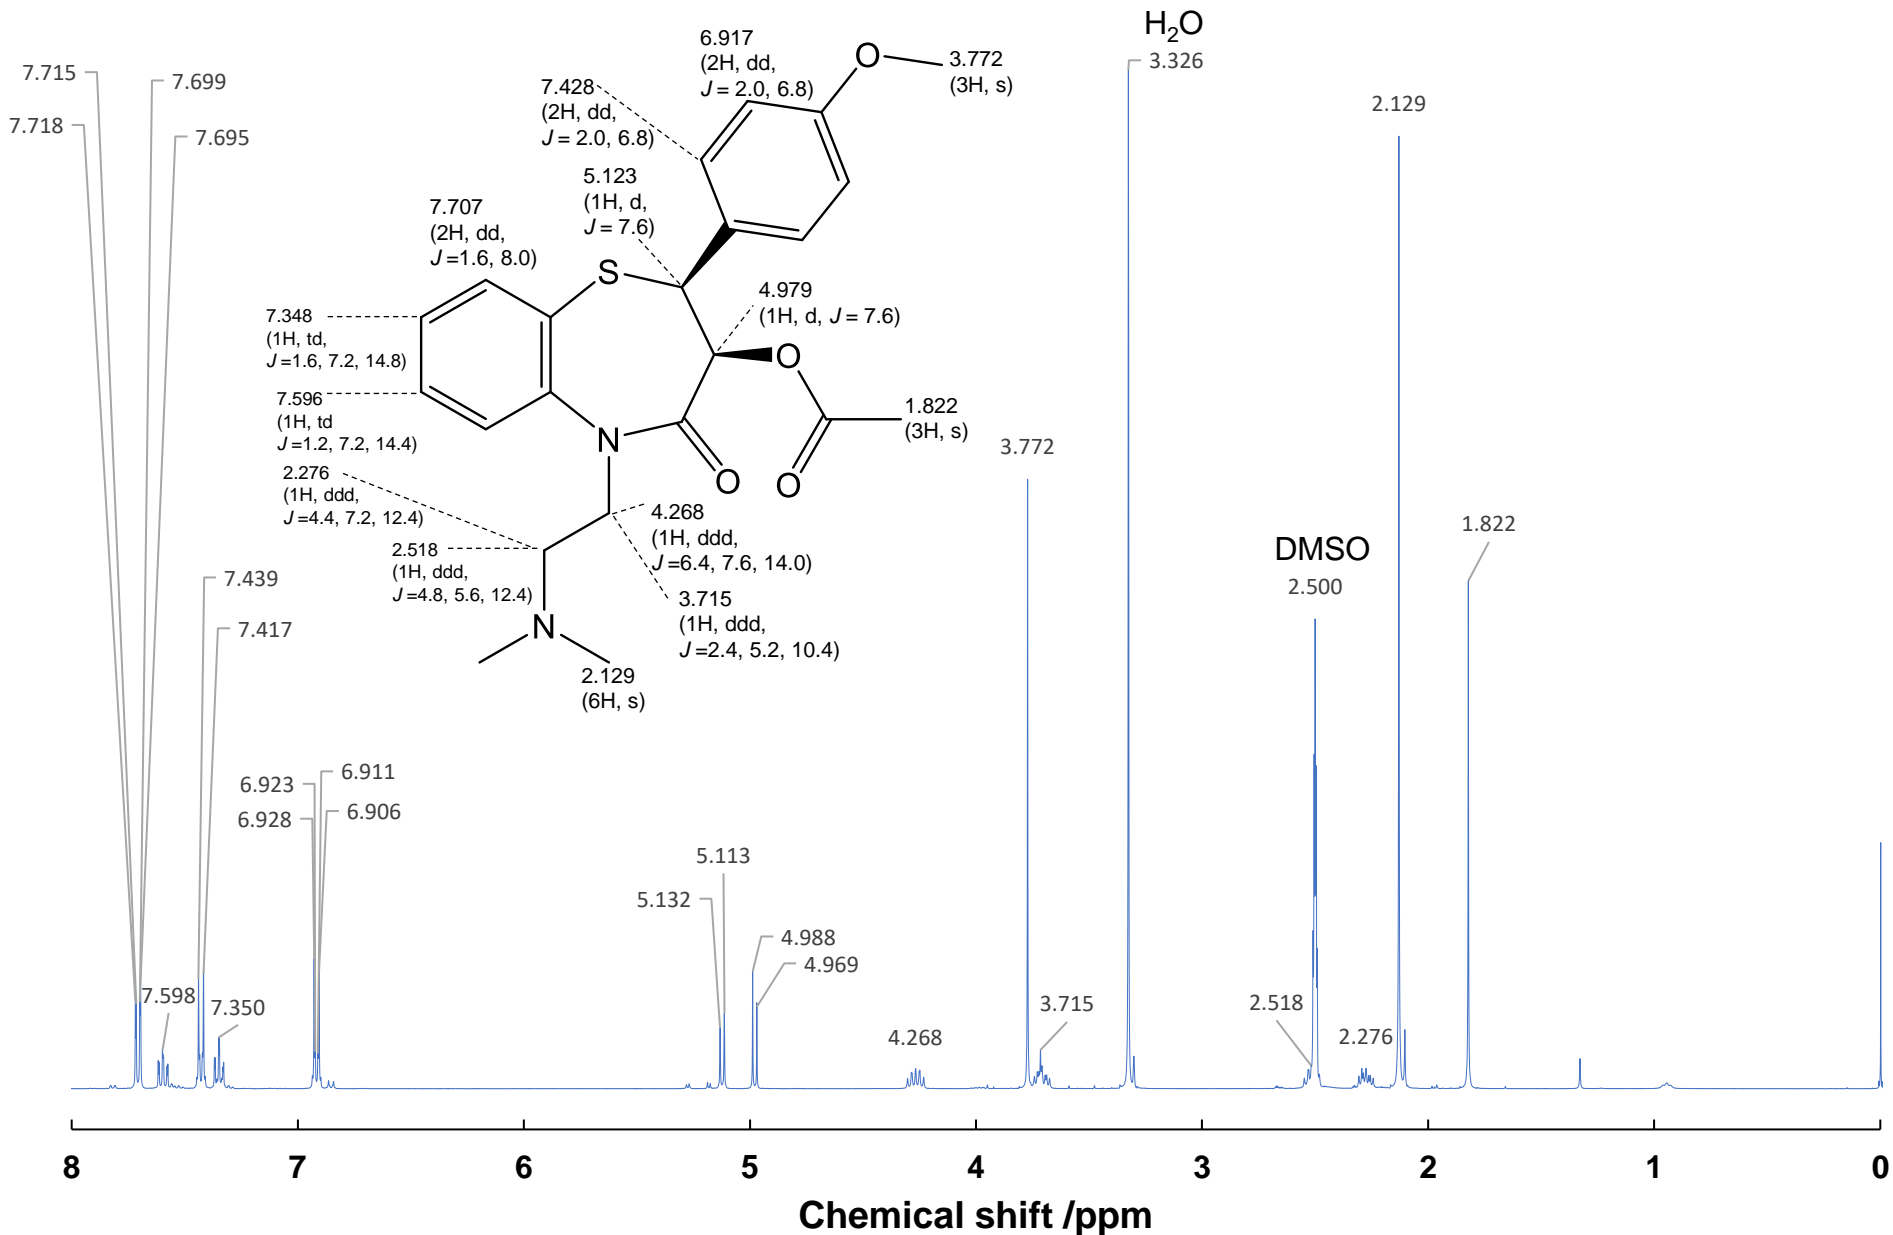

**Figure S5(F-1)** The 400 MHz <sup>1</sup>H-NMR spectrum of DTZ in DMSO-d<sub>6</sub> (at 2.500 ppm). Chemical shifts are listed at the assigned positions in the chemical structural formulas. The number of protons, coupling, and spin-spin coupling constants are shown in parentheses.

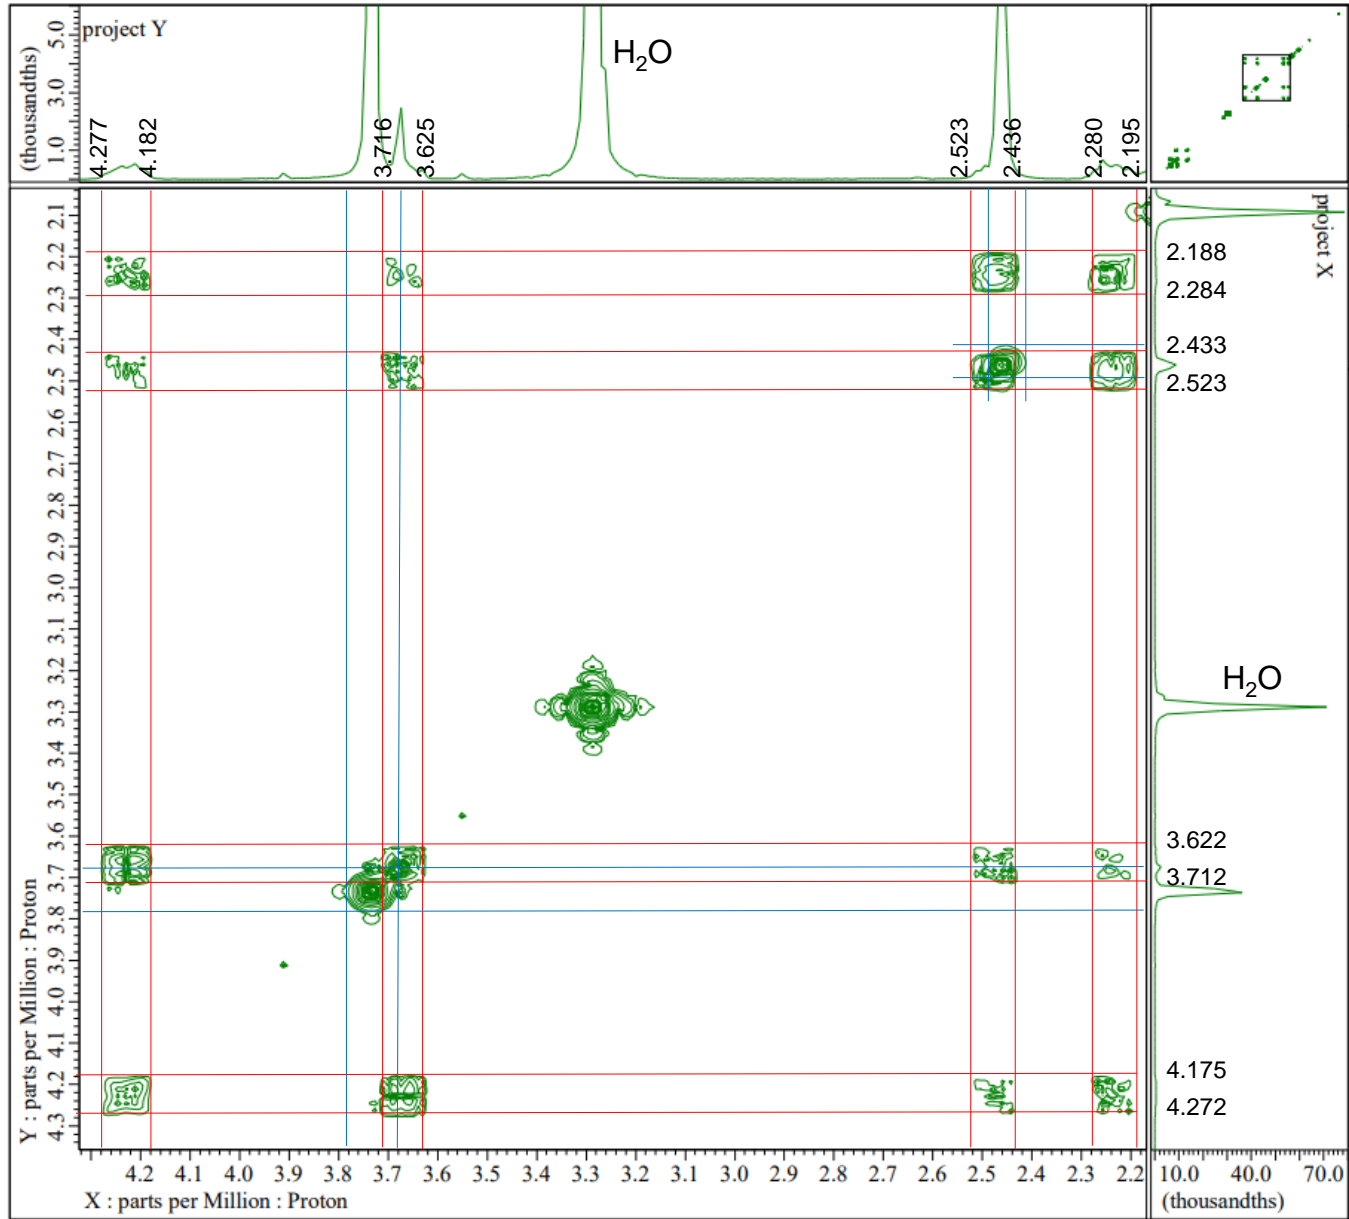

**Figure S5(F-2) The 400 MHz  $^1\text{H}$ - $^1\text{H}$  COSY spectrum of DTZ in  $\text{DMSO-d}_6$ . It was shown that 3.715 and 4.268, 2.518 and 2.276 are geminal couplings.**
